# Supplementary material for: Geometric control by active mechanics of epithelial gap closure
Source: Royal Society of Chemistry journal article supplement (doi:10.1039/d3sm01419c), 2023-12-14
Supplement: d3sm01419c7.pdf [file d3sm01419c7.pdf]

## Supplementary Videos

- **phi\_circle.avi**  
(caption:) Numerical time lapses of wound closure for the half-circle geometry. The parameters of the simulation are listed in Section 4 of the Supplementary Material file.
- **phi\_moon.avi**  
(caption:) Numerical time lapses of wound closure for the half-moon geometry. The parameters of the simulation are listed in Section 4 of the Supplementary Material file.
- **phi\_square.avi**  
(caption:) Numerical time lapses of wound closure for the half-square geometry. The parameters of the simulation are listed in Section 4 of the Supplementary Material file.
- **pressure\_circle.avi**  
(caption:) Numerical time lapses of the pressure field for the half-circle geometry. The parameters of the simulation are listed in Section 4 of the Supplementary Material file.
- **pressure\_moon.avi**  
(caption:) Numerical time lapses of the pressure field for the half-circle geometry. The parameters of the simulation are listed in Section 4 of the Supplementary Material file.
- **pressure\_square.avi**  
(caption:) Numerical time lapses of the pressure field for the half-square geometry. The parameters of the simulation are listed in Section 4 of the Supplementary Material file.
- **velocity.avi**  
(caption:) Numerical time lapses of the pressure field for the half-square geometry. The parameters of the simulation are listed in Section 4 of the Supplementary Material file, except for the Darcy coefficient, which is set to  $Da = 3.87 \text{ e}+02$ .
